# Supplementary material
Source: publisher figshare collection journal article supplement (https://acs.figshare.com/ndownloader/files/3858118)
Supplement: Supplementary file 1 [file 3858118]

# Co-Doped Branched ZnO Nanowires for Ultrasensitive and Sensitive Detection of Xylene

Hyung-Sik Woo,<sup>a</sup> Chang-Hoon Kwak,<sup>a</sup> Jae-Ho Chung<sup>b</sup> and Jong-Heun Lee<sup>\*,a</sup>

<sup>a</sup>Department of Materials Science and Engineering, Korea University,  
Seoul 136-713, Republic of Korea

<sup>b</sup>Department of Physics, Korea University, Seoul 136-713, Korea

\*To whom correspondence should be addressed. Email: [jongheun@korea.ac.kr](mailto:jongheun@korea.ac.kr) ; Fax: +82-2-928-3584 ; Tel: +82-2-3290-3282

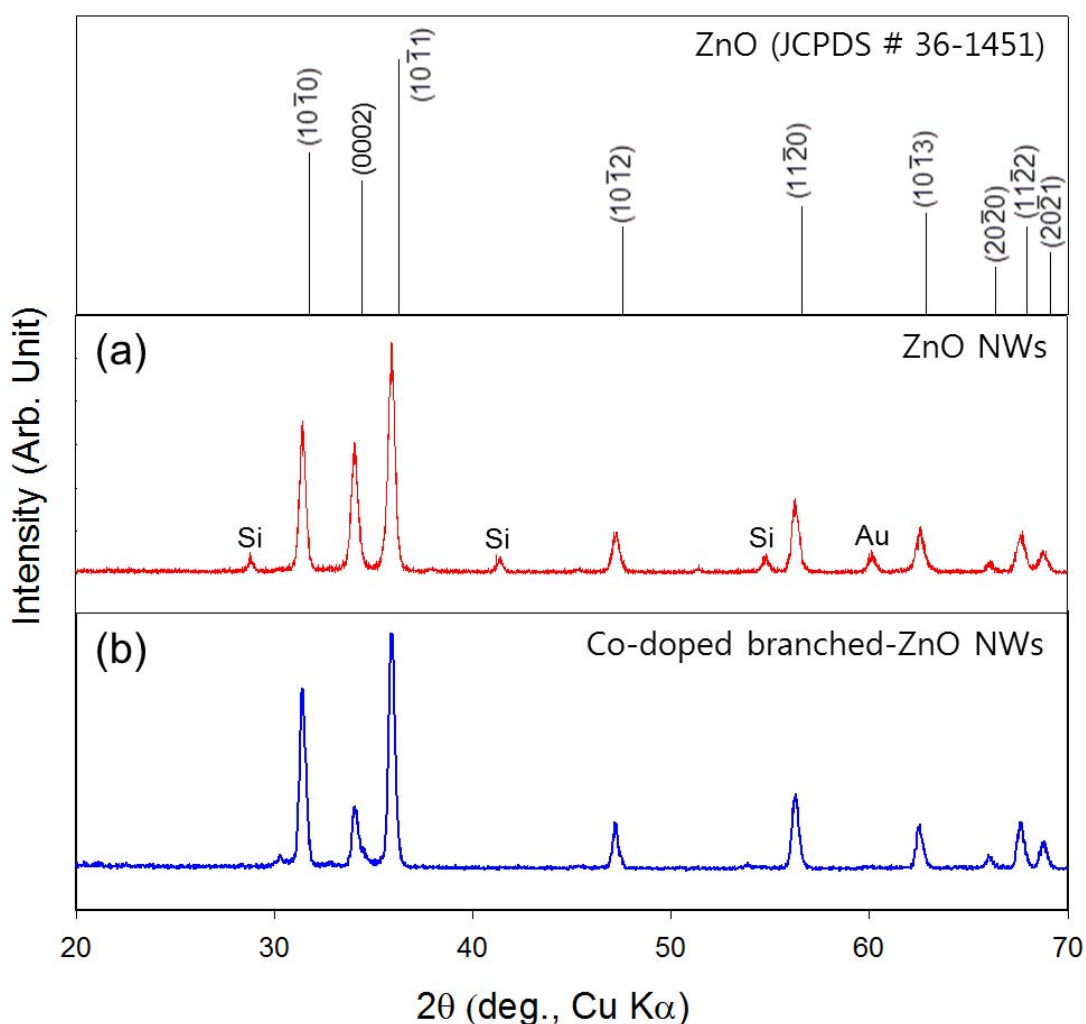

Figure S1 XRD patterns of (a) pristine ZnO NWs and (b) Co-doped branched ZnO NWs.

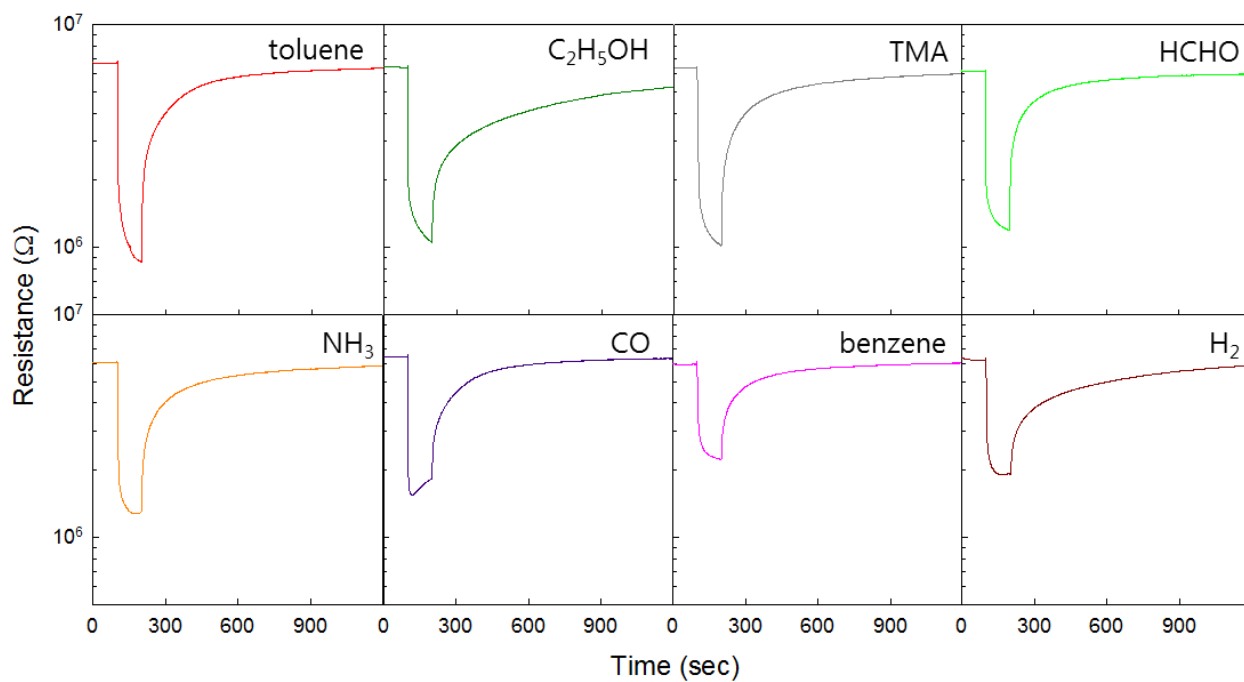

Figure S2 Sensing transients of Co-doped branched ZnO NWs to 5 ppm toluene,  $C_2H_5OH$ , TMA, HCHO,  $NH_3$ , CO, benzene, and  $H_2$  at 400 °C.
